# Supplementary material for: Growth and health outcomes at school age in HIV-exposed, uninfected Zambian children: follow-up of two cohorts studied in infancy
Source: PubMed Central journal article supplement (PMC4458018; doi:10.1186/s12887-015-0386-8), 2015-06-06
Supplement: 12887_2015_386_MOESM1_ESM.pdf [file 12887_2015_386_MOESM1_ESM.pdf]

**Supplementary Table 1. Associations of early HIV exposure with anthropometry and body composition – restricted analysis with confirmed HIV-negative children<sup>1,2</sup>**

|                                        | <b>Adjusted for age and sex<sup>3</sup><br/>(coefficient, 95% CI)</b> | <b>P</b> | <b>Fully adjusted<sup>4</sup><br/>(coefficient, 95% CI)</b> | <b>P</b> |
|----------------------------------------|-----------------------------------------------------------------------|----------|-------------------------------------------------------------|----------|
| <u>Raw measures (n=360)</u>            |                                                                       |          |                                                             |          |
| Weight (kg)                            | -1.17 (-2.45, 0.12)                                                   | 0.07     | -0.37 (-1.61, 0.88)                                         | 0.56     |
| Height (cm)                            | -0.21 (-1.52, 1.09)                                                   | 0.75     | 0.50 (-0.81, 1.80)                                          | 0.46     |
| BMI (kg/m <sup>2</sup> )               | -0.65 (-1.24, -0.06)                                                  | 0.031    | -0.34 (-0.91, 0.23)                                         | 0.24     |
| Waist circumference (cm)               | -0.86 (-2.22, 0.51)                                                   | 0.22     | -0.24 (-1.60, 1.11)                                         | 0.72     |
| Hip circumference (cm)                 | -1.86 (-3.49, -0.23)                                                  | 0.025    | -0.79 (-2.32, 0.81)                                         | 0.32     |
| Thigh circumference (cm)               | -1.03 (-2.09, 0.04)                                                   | 0.06     | -0.41 (-1.45, 0.63)                                         | 0.44     |
| MUAC (cm)                              | -0.75 (-1.40, -0.10)                                                  | 0.025    | -0.35 (-0.99, 0.28)                                         | 0.28     |
| Triceps skinfold (mm)                  | -0.64 (-1.48, 0.20)                                                   | 0.13     | -0.11 (-0.91, 0.69)                                         | 0.79     |
| Subscapular skinfold (mm)              | -0.46 (-1.22, 0.30)                                                   | 0.23     | -0.04 (-0.78, 0.70)                                         | 0.92     |
| <u>Z scores (n=360)</u>                |                                                                       |          |                                                             |          |
| Height-for-age                         | -0.03 (-0.26, 0.20)                                                   | 0.79     | 0.09 (-0.13, 0.32)                                          | 0.42     |
| BMI-for age                            | -0.24 (-0.52, 0.05)                                                   | 0.11     | -0.10 (-0.38, 0.18)                                         | 0.49     |
| <u>Bioelectrical impedance (n=345)</u> |                                                                       |          |                                                             |          |
| Total fat percent                      | -1.25 (-2.36, -0.13)                                                  | 0.029    | -0.70 (-1.79, 0.39)                                         | 0.21     |
| Trunk fat percent                      | -1.14 (-2.27, 0.02)                                                   | 0.047    | -0.69 (-1.80, 0.42)                                         | 0.22     |
| Leg fat percent                        | -1.28 (-2.39, 0.16)                                                   | 0.025    | -0.73 (-1.82, 0.36)                                         | 0.19     |
| Arm fat percent                        | -1.02 (-2.12, 0.08)                                                   | 0.07     | -0.54 (-1.62, 0.54)                                         | 0.32     |

<sup>1</sup>BMI=body mass index, CI-confidence interval, MUAC=mid-upper arm circumference, HEU=HIV-exposed, uninfected, HUU=HIV-unexposed, uninfected

<sup>2</sup>Coefficients are differences between HEU and HUU controls

<sup>3</sup>Adjusted for age and sex for raw measures and bioelectrical impedance but not for Z scores

<sup>4</sup>Adjusted for age, sex, mother's marital status, mother's education, father's education, mother's occupation, father's occupation and asset index tertile; Z scores not adjusted for age and sex
