# Supplementary material for: Growth and health outcomes at school age in HIV-exposed, uninfected Zambian children: follow-up of two cohorts studied in infancy
Source: PubMed Central journal article supplement (PMC4458018; doi:10.1186/s12887-015-0386-8), 2015-06-06
Supplement: 12887_2015_386_MOESM2_ESM.pdf [file 12887_2015_386_MOESM2_ESM.pdf]

**Supplementary Table 2. Blood pressure, biochemical data and school report results for children confirmed HIV-negative<sup>1</sup>**

|                           | HUU               |     | HEU               |    | Unadjusted analysis |      | Adjusted analysis <sup>2</sup> |      |
|---------------------------|-------------------|-----|-------------------|----|---------------------|------|--------------------------------|------|
|                           | Mean (SD)         | N   | Mean (SD)         | N  | B (95% CI)          | P    | B (95% CI)                     | P    |
| <u>Blood pressure</u>     |                   |     |                   |    |                     |      |                                |      |
| Systolic (mmHg)           | 89 (9)            | 275 | 89 (10)           | 82 | 0.2 (-2.0, 2.4)     | 0.85 | 1.4 (-0.6, 3.4)                | 0.18 |
| Diastolic (mmHg)          | 58 (8)            | 275 | 58 (9)            | 82 | -0.2 (-2.3, 1.8)    | 0.83 | 1.0 (-1.0, 3.0)                | 0.32 |
| <u>Blood biochemistry</u> |                   |     |                   |    |                     |      |                                |      |
| CRP (mg/L) <sup>3</sup>   | 1.40 (1.15, 1.70) | 209 | 1.66 (1.13, 2.45) | 66 | 0.17 (-0.24, 0.58)  | 0.42 | 0.14 (-0.28, 0.57)             | 0.51 |
| Cholesterol (mg/dl)       | 159 (58)          | 260 | 166 (52)          | 78 | 7 (-8, 21)          | 0.36 | 6 (-9, 21)                     | 0.42 |
| Haemoglobin (g/L)         | 128 (12)          | 275 | 126 (14)          | 81 | -2 (-5, 2)          | 0.32 | -1 (-4, 2)                     | 0.52 |
| HbA1c (%) <sup>3</sup>    | 5.44 (5.37, 5.51) | 276 | 5.41 (5.30, 5.52) | 82 | -0.01 (-0.03, 0.02) | 0.67 | 0 (-0.03, 0.02)                | 0.77 |
| Glucose (mmol/L)          | 5.4 (1.2)         | 85  | 5.5 (0.6)         | 27 | 0.02 (-0.45, 0.50)  | 0.92 | 0.01 (-0.50, 0.53)             | 0.96 |
| <u>School grades</u>      |                   |     |                   |    |                     |      |                                |      |
| Math (%)                  | 77 (19)           | 98  | 70 (20)           | 21 | -6.5 (-15.7, 2.7)   | 0.16 | -4.3 (-13.4, 4.7)              | 0.35 |
| English (%)               | 79 (18)           | 97  | 82 (18)           | 21 | 2.9 (-5.8, 11.7)    | 0.51 | 5.2 (-3.6, 14.0)               | 0.25 |

<sup>1</sup> CRP=C-reactive protein, CI-confidence interval, HEU=HIV-exposed, uninfected, HUU=HIV-unexposed, uninfected

<sup>2</sup> Adjusted for age, sex, mother's marital status, mother's education, father's education, mother's occupation, father's occupation and asset index tertile

<sup>3</sup> Geometric means and 95% CIs are presented for HUU and HEU results for ease of interpretation but regression coefficients are from the analyses using data transformed to natural logs.
